# Supplementary material for: Changes in Plasma Itaconate Elevation in Early Rheumatoid Arthritis Patients Elucidates Disease Activity Associated Macrophage Activation
Source: Metabolites. 2020 Jun 10;10(6):241. doi: 10.3390/metabo10060241 (PMC7344783; doi:10.3390/metabo10060241)
Supplement: Supplementary file 1 [file metabolites-10-00241-s001.zip]

Archive with 6 entries (6 files):
- Supp 2 - TASER_difference_EDIT_FOR_SUPPLEMENTARY.xlsx
- __MACOSX/._Supp 2 - TASER_difference_EDIT_FOR_SUPPLEMENTARY.xlsx
- Supp 1 - TaSER_AandR_Metabolomics_Supplementary_Figures.pdf
- __MACOSX/._Supp 1 - TaSER_AandR_Metabolomics_Supplementary_Figures.pdf
- Supp 3 - Authentication standards_GB.xlsx
- __MACOSX/._Supp 3 - Authentication standards_GB.xlsx
