# Supplementary material for: Changes in Plasma Itaconate Elevation in Early Rheumatoid Arthritis Patients Elucidates Disease Activity Associated Macrophage Activation
Source: Metabolites. 2020 Jun 10;10(6):241. doi: 10.3390/metabo10060241 (PMC7344783; doi:10.3390/metabo10060241)
Supplement: Supplementary file 1 [file metabolites-10-00241-s001.zip › Supp 2 - TASER_difference_EDIT_FOR_SUPPLEMENTARY.xlsx]

## Sheet: TASER_difference
	DAS03/DAS00 LFC	DAS03/DAS00 qvalue	Mass	Formula	RT	Putative IDs
Peak.n.1204	0.871895	2.78e-06	104.011	C3H4O4	573.514	HMDB00691, C01146, HMDB06938, StdMix1_59, TARTRONATE-S-ALD, OH-PYR, HMDB01352, MALONATE, C00383, C00168
Peak.p.1193	-0.662417	2.78e-06	105.079	C4H11O2N	809.308	C06772, C11260, HMDB04437, diethanolamine
Peak.n.399	0.947087	2.83e-06	164.032	C5H8O6	575.481	C02928
Peak.p.1161	0.791654	1.2e-05	902.39		219.998
Peak.n.424	0.5613	2.48e-05	192.027	C6H8O7	664.652	CPD0-1612, CIT, HMDB00094, HMDB00193, threo-d(s)-iso-citrate, C03921, C03600, HMDB06511, HMDB01874, 5-KETO-4-DEOXY-D-GLUCARATE, THREO-DS-ISO-CITRATE, C00451, C00311, C00679, StdMix2_85, CPD-13907, HMDB05971, C02780, C00158, C04617, C04575
Peak.p.1132	0.654226	2.59e-05	121.074	CH11O3N	668.58	C07183, C07182, CONTAMINANTDB_0028
Peak.p.929	0.431701	2.59e-05	271.178	C14H25O4N	413.62
Peak.p.1160	0.741757	4.16e-05	901.387		219.983
Peak.n.622	0.375332	4.16e-05	148.037	C5H8O5	641.966	L-XYLONO-14-LACTONE, C06029, C06032, C06031, HMDB00426, HMDB00428, HMDB00606, HMDB00694, C03826, C01114, C01087, L-ARABINO-1-5-LACTONE, C03196, StdMix1_60, C05405, HMDB11676, HMDB01900, D-XYLONO-14-LACTONE, C00816, C00815, C02994, CPD-356, C00684, CPD-368, CPD-360, C00652, C02612, C02614, C02630, C02753, C02754, C02266, CPD-13413
Peak.p.212	0.35714	4.16e-05	481.353	C28H49O6	278.378	C13905, C13904, C13903, GPC(16:0)
Peak.p.1439	0.326496	4.16e-05	198.112	C8H14O2N4	758.615
Peak.p.133	-0.553225	0.000182488	263.111		615.773	PEPTIDE_856, PEPTIDE_1100
Peak.p.1278	0.728991	0.000185627	228.147	C11H20O3N2	545.729	PEPTIDE_32, (iso)leucyl-proline, HMDB11174, HMDB11175
Peak.p.421	0.317004	0.000185627	479.337	C23H44ON8P	270.24	HMDB10407, LysoPC(16:0)
Peak.p.811	-0.429165	0.000202042	392.278	C21H36O4N4	235.761
Peak.n.30	0.289734	0.000207743	148.037	C5H8O5	624.588	L-XYLONO-14-LACTONE, C06029, C06032, C06031, HMDB00426, HMDB00428, HMDB00606, HMDB00694, C03826, C01114, C01087, L-ARABINO-1-5-LACTONE, C03196, StdMix1_60, C05405, HMDB11676, HMDB01900, D-XYLONO-14-LACTONE, C00816, C00815, C02994, CPD-356, C00684, CPD-368, CPD-360, C00652, C02612, C02614, C02630, C02753, C02754, C02266, CPD-13413
Peak.p.813	-0.443956	0.000254643	393.282		235.949
Peak.n.346	0.299616	0.000254643	585.365	C32H49O6N4	268.99
Peak.n.754	0.24883	0.000295929	255.196	C15H27O3	211.67
Peak.p.414	0.341829	0.000376768	523.364	C25H48O2N8P	266.402	CPD-8345, HMDB10384, HMDB11128, GPC(18:0/1)
Peak.p.416	0.332305	0.000376768	524.367	?	266.395
Peak.p.121	-0.320885	0.000376768	261.157	C12H23O5N	501.029
Peak.n.825	0.297933	0.000376768	584.353	C41H46O2N	272.122	CPD1UA-5664, CPD-11481
Peak.n.380	0.297588	0.000376768	583.35		272.089
Peak.n.1410	0.270062	0.000376768	436.259	C21H41O7P	274.695	GPP(18:1/1), C03805, C03806, HMDB11133, CPD0-2113, HMDB07855, HMDB07851
Peak.p.969	0.259204	0.000376768	681.479		219.79
Peak.n.811	0.18509	0.000376768	494.397	C25H51N8P	209.989
Peak.n.714	0.375409	0.000380244	130.027	C5H6O4	672.75	GLUTARATE, glutaconic acid, HMDB00634, HMDB00620, HMDB00749, C01732, HMDB02092, CPD-2461, itaconic acid, C00433, C00490, StdMix3_7, citraconic acid, StdMix2_61, CPD-654, mesaconic acid, C02800, C02214, C02226, C02132
Peak.p.203	0.241456	0.000380244	497.339		275.155
Peak.p.905	0.215825	0.00040526	551.419		210.838
Peak.n.757	0.292045	0.000427951	586.368		269.068
Peak.p.420	0.325877	0.00044979	525.37	C29H48N7P	266.54
Peak.p.207	0.376248	0.000457983	494.32		278.37
Peak.p.417	0.337734	0.000459515	522.352		269.005
Peak.p.1531	0.198016	0.000467253	450.371	C28H50O4	211.066	C15802, CPD-723
Peak.n.141	0.432691	0.000476334	292.132	C17H16ON4	214.439	C11740
Peak.n.125	0.234446	0.000476334	557.333		278.172
Peak.n.357	0.224906	0.000476334	558.337		278.19
Peak.p.205	0.38926	0.000510528	991.668		275.172
Peak.n.29	0.381993	0.000510528	130.027	C5H6O4	675.803	GLUTARATE, glutaconic acid, HMDB00634, HMDB00620, HMDB00749, C01732, HMDB02092, CPD-2461, itaconic acid, C00433, C00490, StdMix3_7, citraconic acid, StdMix2_61, CPD-654, mesaconic acid, C02800, C02214, C02226, C02132
Peak.p.202	0.348593	0.000510528	493.317	C24H48NO7P	278.395	CPD-8344, HMDB10383, lysoPC(16:1)
Peak.n.966	0.23739	0.000510528	559.339		278.151
Peak.n.352	0.170309	0.000510528	233.183		211.87
Peak.p.200	0.23982	0.000520793	496.336		275.191
Peak.n.874	0.300686	0.000539128	555.318		281.576
Peak.p.415	0.315978	0.000550579	521.349	C26H52O7NP	268.955	CPD-8346, HMDB10385, HMDB02815, GPC(18:1/-1)
Peak.p.863	0.265987	0.000550579	578.491	C36H66O5	203.872	HMDB07074, HMDB07242
Peak.p.965	0.238529	0.000550579	679.473		219.778
Peak.p.198	0.234056	0.000550579	495.332	C24H50O7NP	274.752	CPD-8343, HMDB10382, GPC(16:0/1)
Peak.n.973	0.185513	0.000552683	438.335		215.664	HMDB02126
Peak.p.966	0.219688	0.000559952	680.476		219.704
Peak.n.1023	0.216747	0.000559952	467.369		213.022
Peak.n.529	-0.37327	0.000569387	375.252		237.605
Peak.n.1306	0.269439	0.000569387	750.541		234.751	HMDB10600, HMDB10572
Peak.p.204	0.410861	0.000650706	990.664		275.208
Peak.p.668	0.264163	0.000650706	544.336		267.948
Peak.n.1378	0.167487	0.000714075	870.583		234.367
Peak.n.308	0.365893	0.000715354	292.634		214.165
Peak.n.1446	0.274385	0.000733395	587.371		269.16
Peak.n.169	-0.588418	0.000797209	368.166		216.798	HMDB02833, HMDB01032, C04555
Peak.p.113	0.282273	0.000797209	165.079		495.798	C18090, HMDB00159, PHE, CPD0-1380, phenylalanine, HMDB04992, 4-3-PYRIDYL-BUTANOATE, StdMix1_12, HMDB06044, C07527, STD_PHENYLALANINE, HMDB01007, CPD-216, C00079, C02265, C02057
Peak.n.888	0.242063	0.000802427	260.708		209.811
Peak.n.479	0.268971	0.000853872	275.23		206.064
Peak.n.1217	0.220333	0.000853872	606.337		270.884
Peak.p.967	0.21562	0.000853872	662.446		219.825
Peak.n.1307	0.194152	0.000853872	495.401		210.201
Peak.p.1265	0.193349	0.000853872	497.372		213.752
Peak.p.299	-0.413748	0.000914214	201.111		522.266
Peak.p.209	0.309041	0.000926529	481.317		279.418	HMDB10381, GPC(15:0/1), GPE(18:0/1), lysoPC(15:0), lysoPE(18:0), HMDB11129, HMDB11130, CPD0-2223, CPD0-2152
Peak.p.208	0.303815	0.000926529	509.348		270.553	HMDB12108, HMDB11511, GPC(17:0/1), HMDB11481
Peak.p.115	0.279842	0.000926529	166.082		496.42
Peak.n.584	0.129492	0.000926529	446.34		211.505	C15792, C14505, C14578, CPD-718, C14158
Peak.n.1453	0.296607	0.000935664	571.349		273.675
Peak.n.532	0.500405	0.000950427	192.027		551.992	CPD0-1612, CIT, HMDB00094, HMDB00193, threo-d(s)-iso-citrate, C03921, C03600, HMDB06511, HMDB01874, 5-KETO-4-DEOXY-D-GLUCARATE, THREO-DS-ISO-CITRATE, C00451, C00311, C00679, StdMix2_85, CPD-13907, HMDB05971, C02780, C00158, C04617, C04575
Peak.n.899	0.197252	0.000964846	522.429		208.708
Peak.p.666	0.250786	0.000983973	543.332		267.887	HMDB10396, HMDB10395, LysoPC(20:4)
Peak.p.853	0.319904	0.000994632	614.532		204.652
Peak.p.667	0.294846	0.000998433	545.348		266.269	HMDB10393, HMDB10394, lysoPC(20:3)
Peak.p.119	0.258369	0.00100334	206.106		494.644	C07499, C12598, C12596, C12597, C12594, C12595, C12592, C12593, C12590, C12591
Peak.p.579	0.379657	0.00100441	584.263		212.574	HMDB00488, HMDB00054, C11630, C05913, C00486
Peak.n.621	0.307297	0.00102146	299.254		207.654
Peak.p.210	0.471454	0.00106536	1016.68		272.859
Peak.p.43	0.265387	0.00106536	119.074		495.138
Peak.n.855	0.248489	0.00106536	560.482		204.644
Peak.n.828	0.21941	0.00106536	605.334		270.716
Peak.n.798	0.215865	0.00106536	281.249		203.602	CPD-8477, HMDB02080, OLEATE-CPD, CPD-9247
Peak.p.214	0.321366	0.00111537	510.352		270.506
Peak.p.1266	0.164673	0.0012495	438.335		214.299	HMDB02126
Peak.p.858	0.302107	0.00131397	612.516		204.959
Peak.n.882	0.200177	0.00136535	410.243		278.157	C04036, HMDB07849, HMDB07853
Peak.p.127	0.482588	0.00142128	257.103		604.178	HMDB00086, StdMix1_39, glycerophosphocholine
Peak.p.590	0.334365	0.0014568	298.131		212.572
Peak.n.1051	0.291325	0.00156721	290.755		205.364
Peak.p.851	0.288272	0.00175739	316.261		204.947	C08314, C15988, HMDB11532, HMDB11563
Peak.p.848	0.280168	0.00175739	298.251		205.073	HMDB10736, C08365, C13791, C00869, oxooctadecanoic acid
Peak.n.764	0.16495	0.00177529	464.351		214.314	CPD-12497, CPD-12498, HMDB02163, C15794, C17733, C17735, CPD-10552, CPD-634
Peak.p.128	0.469962	0.0017787	258.106		604.297
Peak.p.580	0.365126	0.0017787	585.267		212.484
Peak.p.669	0.292659	0.00183719	546.351		266.064
Peak.n.277	0.16221	0.00189551	234.191		211.443
Peak.n.1013	0.238057	0.00192207	412.392		212.89
Peak.n.1156	0.157044	0.00198427	452.387		210.63
Peak.p.418	0.268515	0.00205998	567.332		264.6	HMDB10404, GPC(22:6/1)
Peak.n.1236	0.263374	0.00210452	629.334		266.927
Peak.p.852	0.282496	0.00212889	611.512		204.857
Peak.p.422	0.282367	0.00214479	568.336		264.727
Peak.n.655	0.299171	0.00215417	284.737		207.822
Peak.n.1440	0.276195	0.00228196	608.353		268.983
Peak.p.598	0.162437	0.00228196	482.38		212.057
Peak.n.948	0.16571	0.00228754	492.382		212.227
Peak.p.584	0.130529	0.00235102	483.392		211.131
Peak.p.693	0.270982	0.00243902	541.316		270.778	HMDB10397, GPC(20:5/1)
Peak.n.1047	0.251939	0.00243902	382.381		211.152	HMDB02361
Peak.n.607	0.220765	0.00243902	237.186		208.517
Peak.p.322	0.352713	0.00244925	495.332		412.615	CPD-8343, HMDB10382, GPC(16:0/1)
Peak.n.1123	0.178035	0.00244925	449.359		211.201
Peak.p.855	0.263894	0.0024895	333.288		205.545
Peak.n.1017	0.204011	0.00255384	253.217		206.107	CPD-9768, CPD-9767, CPD-9245
Peak.n.328	0.284004	0.00264831	297.745		206.244
Peak.p.213	0.219228	0.00264831	498.341		275.114
Peak.n.1048	0.207995	0.00264831	438.371		211.848
Peak.n.1066	0.274076	0.00267258	607.349		268.819
Peak.n.94	0.274048	0.00267258	112.027		502.297	HMDB00300, URACIL, StdMix2_9, C00106, uracil
Peak.p.847	0.297666	0.0027041	613.528		204.806
Peak.p.1020	0.153296	0.00270967	555.45		209.631
Peak.n.145	0.289441	0.00273068	297.243		206.244	2-OXOSTEARATE, CPD-12193, CPD-10514, 18-HYDROXYOLEATE
Peak.n.430	0.263177	0.00273578	91.0349		477.427
Peak.n.549	0.259859	0.00273578	175.048		605.326	HMDB00812, C01042, C01045, C05520, C05524, CPD-600, HMDB03470
Peak.n.455	0.177952	0.00273578	270.721		208.482
Peak.n.897	0.274319	0.00273732	579.495		205.321
Peak.p.587	0.353717	0.00276163	586.27		212.594
Peak.n.1035	0.209161	0.002785	502.403		207.293
Peak.p.206	0.456411	0.00278942	1014.66		273.916
Peak.n.185	0.301096	0.00283123	298.753		205.796
Peak.n.201	0.296917	0.00285356	596.502		206.372
Peak.p.290	-0.254244	0.00302748	487.387		221.59
Peak.n.854	0.206878	0.00309169	218.178		211.284
Peak.n.92	0.294151	0.00330263	298.251		207.199	HMDB10736, C08365, C13791, C00869, oxooctadecanoic acid
Peak.p.865	0.249821	0.0035964	299.254		205.32
Peak.p.877	0.174866	0.0035964	206.167		210.2	C11350, C09690, C14205, C14132
Peak.n.113	0.2824	0.00370018	244.07		504.872	HMDB00767, HMDB00296, StdMix1_65, CPD-497, C00299, C16745, URIDINE, C02067, C02068, C02069
Peak.p.593	0.162739	0.00372416	538.424		209.958
Peak.p.634	0.202534	0.00378706	689.555		249.333
Peak.n.52	0.264448	0.00389644	134.022		655.123	MAL, HMDB00744, HMDB00156, C03064, malic acid, C00711, C00497, StdMix2_68, C00149
Peak.n.1033	0.280621	0.00390852	603.317		273.787
Peak.n.926	0.241182	0.00390852	550.46		206.513
Peak.p.326	-0.216573	0.00390852	147.09		423.031	C10144
Peak.p.1254	0.141342	0.00390852	492.382		210.191
Peak.p.1246	0.135927	0.00390852	457.377		212.555
Peak.p.869	0.234411	0.00391148	281.243		206.56
Peak.n.623	0.265422	0.00406291	595.49		206.731
Peak.n.1125	0.206647	0.00406291	422.34		213.761
Peak.n.501	0.252064	0.00408594	288.74		205.425
Peak.n.434	0.170921	0.00408594	261.214		208.042
Peak.p.891	0.139495	0.00408594	539.455		206.908
Peak.p.588	0.121281	0.00408594	481.377		211.918
Peak.p.1252	0.137894	0.00415374	448.355		211.718	C15791, C15793, CPD-719, CPD-716
Peak.n.862	0.196414	0.0041678	261.716		208.166
Peak.p.215	0.212515	0.00419946	453.285		272.02	CPD-8353, GPC(13:0/1), HMDB11503, CPD0-2177, HMDB11473, GPE(16:0/1), CONTAMINANTDB_0171
Peak.n.23	0.25148	0.00424367	90.0316		479.015	3-HYDROXY-PROPIONATE, L-GLYCERALDEHYDE, HMDB00700, HMDB00190, C01432, C01013, D-LACTATE, DIHYDROXYACETONE, HMDB01882, L-LACTATE, HMDB01311, HMDB01051, C00577, StdMix2_91, GLYCERALD, C00256, C00186, C00184, C02154, C02426, StdMix1_104
Peak.p.597	0.142768	0.00424367	521.416		209.136
Peak.n.772	0.220558	0.00436537	541.338		277.101
Peak.n.1086	0.22437	0.00440507	231.167		214.5
Peak.p.1262	0.145446	0.00459356	455.36		213.778
Peak.p.365	0.655678	0.00462076	185.105		421.953	CPD0-1483, HMDB06348, HMDB06548, CPD-9779, C10858, C10356, C12449
Peak.n.104	-1.04481	0.0046531	225.069		235.834
Peak.n.1138	0.173465	0.00471471	484.377		213.523
Peak.n.573	0.24736	0.00474976	576.476		205.635	HMDB07076, HMDB07075, HMDB07300, HMDB07271
Peak.p.589	0.132754	0.00474976	466.366		211.21	C15803, C15804, C15805, C15806, C15807, CPD-724
Peak.p.850	0.248527	0.00482813	280.24		206.781	linoleic acid, C04056, C08321, C08282, HMDB00673, C08459, C01595, HMDB06270, HMDB03797, HMDB05048, HMDB05047
Peak.n.625	0.135526	0.00491034	466.366		212.924	C15803, C15804, C15805, C15806, C15807, CPD-724
Peak.n.831	0.254968	0.00507678	275.732		206.172
Peak.p.216	0.204704	0.00511987	507.369		272.526	GPC(18:1/1), HMDB13122
Peak.n.620	0.185281	0.00528631	262.222		207.567
Peak.n.961	-0.140916	0.00536139	121.02		647.198	CYS, cysteine, HMDB00574, D-CYSTEINE, StdMix3_25, C00793, C00736, C00097, HMDB03417
Peak.n.404	0.16578	0.00536899	248.207		208.053
Peak.n.364	0.275453	0.00555296	284.235		207.998	C13792, oxo-heptadecanoic acid, C13946, 2-methoxy-hexadecenoic acid, C14996
Peak.p.861	0.22906	0.00555296	593.502		203.177
Peak.p.1263	0.156448	0.00555296	511.424		208.209
Peak.n.1230	0.29437	0.00558464	125.048		424.161	CPD-12469, 3-HYDROXYAMINOPHENOL, N-ETHYLMALEIMIDE, C14604, C14602, C02854, C02441, AMINOHYDROQUINONE, C16671
Peak.n.523	0.147243	0.00558464	232.175		213.516
Peak.n.58	0.214881	0.0057301	165.079		503.739	C18090, HMDB00159, PHE, CPD0-1380, phenylalanine, HMDB04992, 4-3-PYRIDYL-BUTANOATE, StdMix1_12, HMDB06044, C07527, STD_PHENYLALANINE, HMDB01007, CPD-216, C00079, C02265, C02057
Peak.n.409	0.154929	0.00574072	247.199		209.156
Peak.p.857	0.266398	0.00577232	576.475		204.425	HMDB07076, HMDB07075, HMDB07300, HMDB07271
Peak.n.970	0.195652	0.00588692	219.186		210.821
Peak.n.762	0.166725	0.00588692	233.685		212.201
Peak.n.787	0.763001	0.00591271	146.022		591.785	C06030, C06316, HMDB00208, C03716, 2-ketoglutaric acid, R-2-HYDROXYGLUTARATE, CPD-7066, S-CITRAMALATE, C05407, C05406, CPD-381, StdMix2_66, C00026, CPD-31, 2-KETOGLUTARATE
Peak.n.713	0.188634	0.00599797	212.178		214.44	C18210, C18206, C18209, C18208
Peak.n.709	0.388162	0.00602957	584.264		215.149	HMDB00488, HMDB00054, C11630, C05913, C00486
Peak.n.356	0.210255	0.00602957	166.082		503.368
Peak.p.856	0.269022	0.00609958	594.486		205.06
Peak.n.1157	0.186988	0.00609958	281.75		203.819
Peak.n.847	0.185616	0.00609958	227.183		212.4
Peak.p.401	0.174645	0.00609958	75.032		653.93	C06808, GLY, HMDB00123, STD_GLYCINE, C01837, CPD-12077, StdMix1_38, C00037, glycine
Peak.n.539	0.135379	0.00609958	468.382		212.235
Peak.n.452	0.250388	0.00623114	130.024		476.079
Peak.n.1262	0.20283	0.00623114	205.072		503.459
Peak.n.1049	0.186464	0.00623114	436.356		212.133	HMDB00524, HMDB00520, HMDB00655, 5-BETA-CHOLESTANE-3-ALPHA7-TETRAOL, C05446, HMDB01968, HMDB01231
Peak.n.504	0.180171	0.00623114	260.207		209.615
Peak.n.1075	0.240971	0.0062871	92.0358		478.025
Peak.p.870	0.275241	0.00631822	607.481		205.253
Peak.n.580	0.154286	0.00631822	246.191		211.28
Peak.p.871	0.184906	0.00636489	224.177		211.206	HMDB00560, tetradecynoic acid, tetradecadienoic acid, 9-(2-cyclopentenyl)-nonanoic acid
Peak.n.769	0.168532	0.00636489	247.7		209.43
Peak.n.545	0.16691	0.00636489	75.0316		660.449
Peak.n.929	0.140983	0.00636489	469.385		212.337
Peak.p.854	0.261332	0.00655594	596.501		205.15
Peak.n.941	0.251568	0.00655594	577.479		205.659
Peak.n.19	0.24205	0.00655594	129.043		489.383	pyroglutamic acid/5-oxoproline, C04282, C04281, PYRROLINE-HYDROXY-CARBOXYLATE, 5-OXOPROLINE, HMDB00805, HMDB00267, HMDB02234, C01877, C01879, HMDB01843, HMDB01369, CPD0-2462, StdMix2_11, C02237
Peak.n.219	0.227428	0.00659609	289.246		204.984
Peak.n.274	-0.202002	0.00673661	309.106		573.664	HMDB00773, HMDB00230, N-ACETYLNEURAMINATE, C03526, C03525, StdMix2_74, C00270
Peak.p.1255	0.171612	0.00675776	525.403		212.123
Peak.n.395	0.219681	0.00678568	276.238		205.084
Peak.p.942	0.238678	0.00682013	188.127		1025.91	HMDB00670, C01924, C03884
Peak.p.635	0.378205	0.00691814	523.364		411.418	CPD-8345, HMDB10384, HMDB11128, GPC(18:0/1)
Peak.n.687	0.241445	0.00701136	276.739		205.414
Peak.p.120	0.246605	0.0070356	120.077		496.448
Peak.n.1117	0.205818	0.00706659	283.729		208.377
Peak.n.419	0.266996	0.00707298	597.506		206.387
Peak.n.317	0.254649	0.00707298	594.487		206.692
Peak.n.1115	0.1878	0.00707298	474.371		209.265	C08789, C08634, C17419
Peak.p.695	0.224317	0.00721954	542.319		270.876
Peak.p.576	0.199359	0.00721954	316.208		249.681
Peak.p.1450	0.147385	0.00721954	527.419		210.979
Peak.p.595	0.136944	0.00735253	494.397		208.08
Peak.p.968	0.17136	0.00742852	663.45		220.341
Peak.p.949	-0.33522	0.007548	203.127		546.462	PEPTIDE_48
Peak.p.424	2.63836	0.00771572	249.111		238.7
Peak.n.636	0.178225	0.0077501	269.714		210.835
Peak.n.871	0.241843	0.0080108	453.286		274.814	CPD-8353, GPC(13:0/1), HMDB11503, CPD0-2177, HMDB11473, GPE(16:0/1), CONTAMINANTDB_0171
Peak.n.423	0.235524	0.0080108	289.747		205.052
Peak.p.438	0.228088	0.0080108	158.084		552.354	C10161
Peak.p.849	0.214997	0.0080108	278.224		206.402	alpha/gamma-linolenic acid, C06427, C06426, C08315, C08364, C15201, C07289, HMDB01388, HMDB03073
Peak.p.575	0.207461	0.0080108	315.205		249.85	C12947, C12946
Peak.n.1073	0.12967	0.0080108	869.579		234.189
Peak.p.874	0.220097	0.00812887	262.229		206.508	9, 12, 15-octadecatrienal, C14245, 6-[3]-ladderane-1-hexanol
Peak.n.309	0.161898	0.00812887	269.212		210.589	CPD-10512
Peak.p.882	0.161652	0.00812887	540.439		208.624
Peak.n.749	0.137758	0.00812887	499.938		205.104	C18142
Peak.p.293	-0.332425	0.00815102	75.0684		520.88	HMDB00925, TRIMENTHLAMINE-N-O, HMDB12136, C01104, C03194, C05771, 1-AMINO-PROPAN-2-OL, StdMix2_39
Peak.n.719	0.173412	0.00840382	280.742		203.933
Peak.p.932	0.331045	0.00855536	467.301		283.447	HMDB10379, lysoPC(14:0)
Peak.n.449	0.156802	0.00891737	256.204		211.767
Peak.n.482	0.147642	0.00896329	540.439		208.977
Peak.n.245	0.235017	0.00905478	130.046		489.912
Peak.n.493	0.223272	0.00905478	578.492		205.31	HMDB07074, HMDB07242
Peak.n.1090	0.181854	0.00905478	490.366		214.097	C08931, C17459, C16783
Peak.p.890	0.141376	0.00905478	537.44		208.099
Peak.p.641	1.22215	0.00917279	132.069		380.808	C01819, C01820
Peak.p.907	0.23538	0.00917279	561.484		203.613
Peak.p.943	0.230974	0.00917279	189.131		1025.75
Peak.p.1280	0.183891	0.00933463	749.535		223.4	HMDB09675, HMDB09642, CPD-8262, HMDB09446, HMDB09447, HMDB09413, HMDB09414, HMDB09478, HMDB11359, HMDB11360, HMDB11387, HMDB11418, HMDB11419, HMDB11452, HMDB11451
Peak.p.1269	0.178871	0.00939275	436.319		214.497	HMDB02195
Peak.n.696	0.215039	0.00944612	151.025		489.895
Peak.n.635	0.31578	0.00964822	285.243		205.714
Peak.n.812	0.22903	0.00964822	552.476		205.463	HMDB07070, HMDB07126
Peak.n.250	0.27037	0.00977306	581.334		275.265
Peak.n.1011	0.209852	0.00977306	275.112		616.041	C18048, PEPTIDE_12, C05283, HMDB11738, CPD0-2056, HMDB05766, PEPTIDE_1046
Peak.n.932	-0.20254	0.0101586	159.134		239.633
Peak.n.799	0.177837	0.0102212	226.175		212.094
Peak.p.592	0.115367	0.0102212	222.162		212.711	CPD-4745, C09715, C16977, C16983
Peak.p.1356	-0.228691	0.0102393	161.069		483.582	C06234, CPD1A0-6176, HMDB00510, CPD-12247, acetyl-homoserine, C01077, C01046, C03210, C17581, C05016, CPD0-2077, STD_AMINOADIPIC_ACID, C00956, StdMix2_25, CPD-667, C02207
Peak.n.1014	0.212854	0.0102393	749.537		234.717	HMDB09675, HMDB09642, HMDB09446, HMDB09447, HMDB09413, HMDB09414, HMDB09478, HMDB11359, HMDB11360, HMDB11387, HMDB11418, HMDB11419, HMDB11452, HMDB11451
Peak.n.322	-1.30499	0.0105811	225.571		235.819
Peak.n.589	-0.356857	0.010607	174.112		999.201	HMDB00517, STD_ARGININE, arginine, StdMix1_46, C00792, C00062, HMDB03416, C02385, ARG
Peak.p.1261	0.140378	0.0107911	499.388		213.698
Peak.p.397	0.240085	0.0111323	155.07		627.916	HIS, C06419, HMDB00177, C01162, StdMix1_43, CPD-12151, histidine, BACIMETHRIN, C00769, C00768, STD_HISTIDINE, CPD-670, C00135
Peak.n.921	0.202927	0.0111924	232.677		213.861
Peak.n.935	-0.322878	0.0114791	105.051		431.194
Peak.n.1175	0.206872	0.0114791	237.687		208.958
Peak.p.463	0.100205	0.0114791	807.576		229.097	CPD-8376, GPP(43:6/2), HMDB08402, HMDB08338, HMDB08337, HMDB08306, HMDB08369, HMDB08433, HMDB08432, HMDB08497, HMDB08466, HMDB08465, HMDB08659, HMDB08627, HMDB08692, HMDB08050, HMDB08021, HMDB08082, HMDB08081, HMDB08139, HMDB08115, HMDB08114, HMDB08177, HMDB08146, HMDB08210, HMDB08242, GPC(38:5/2), HMDB07990, HMDB07989
Peak.n.248	0.211548	0.0118191	288.238		205.28
Peak.p.329	-0.274735	0.0118471	133.074		438.476	CPD-8128, CPD-8857
Peak.n.805	0.171167	0.0118471	248.708		208.153
Peak.p.896	0.151118	0.0118471	178.136		211.376	C07523, CPD-11437, C14465
Peak.n.574	-0.212298	0.0119731	180.042		427.031	HMDB00707, C01405, C01406, HMDB02130, C01481, C01197, C01179, HMDB06915, C05351, C05350, HMDB11663, HMDB01879, HMDB01964, HMDB03501, C12623, StdMix2_63, P-HYDROXY-PHENYLPYRUVATE
Peak.p.867	0.143123	0.0122027	558.468		205.528
Peak.n.182	0.242563	0.0124458	205.074		425.148	HMDB00671, indolelactate, HMDB04096, C05660, CPD-12020, HMDB11621, C09961, C10741, C02043
Peak.p.622	0.128225	0.0125528	674.536		250.114	HMDB12097, C14 sphingomyelin
Peak.n.800	0.164536	0.0128842	211.17		213.066
Peak.n.712	0.137602	0.0128842	496.413		208.979
Peak.n.1188	0.124928	0.013091	641.316		279.475
Peak.p.199	0.270948	0.0131936	519.333		272.125	CPD-8347, HMDB10386, GPC(18:2/-1)
Peak.p.1451	0.140262	0.0139926	486.411		210.132
Peak.p.1175	-0.196282	0.0142626	162.053		620.384	C06485, C06158, C06159, CPD-8938, C18028, C06474, C06478, C06479, HMDB00640, C11592, CPD0-1305, HMDB00321, HMDB00368, HMDB00355, HMDB00345, DIETHYLPYROCARBONATE, C01989, C03979, C03827, L-RHAMNONO-14-LACTONE, C03761, C01088, C03652, C17209, L-RHAMNO-14-LACTONE, C00478, C02991, 15-ANHYDRO-D-FRUCTOSE, C02488, C02492, C02360, C16390
Peak.n.25	-0.308823	0.0143092	104.047		433.393	C06001, HMDB00442, HMDB00729, HMDB00710, HMDB00023, HMDB00011, HMDB00008, HMDB00336, HMDB00357, C01991, CPD-6485, C01188, C01089, C03197, C05984, StdMix1_51, C00989, CPD-3621, 3-HYDROXY-ISOBUTYRATE, CPD-335, C14601, 3-hydroxy-isobutyrate
Peak.p.1245	0.119777	0.0143092	464.35		212.317	CPD-12497, CPD-12498, HMDB02163, C15794, C17733, C17735, CPD-10552, CPD-634
Peak.n.1280	0.197908	0.0143274	747.521		234.648	HMDB09708, HMDB09479, HMDB09480, HMDB11420, HMDB11453, GPE(38:6//1), HMDB05780
Peak.n.943	0.145524	0.0143545	518.397		211.06
Peak.p.1010	0.179464	0.0143591	600.474		200.61
Peak.p.482	0.112854	0.0143591	769.596		231.022
Peak.p.1334	0.105892	0.0143591	518.397		209.11
Peak.p.1544	0.135553	0.0144242	508.376		212.427
Peak.p.400	0.133239	0.0144242	105.043		653.189	CPD-8150, HMDB00187, serine, D-SERINE, SER, STD_SERINE, StdMix1_34, C00716, C00740, C00065, HMDB03406, CONTAMINANTDB_0023
Peak.p.28	-0.103887	0.0144979	162.102		581.261
Peak.n.917	0.140391	0.0145657	520.413		210.305
Peak.n.639	0.295474	0.0146232	258.183		292.378	methyl-tridecadioic acid, tetradecanedioic acid, HMDB00872, C14260, C14253
Peak.n.886	0.187539	0.0146232	265.217		205.531
Peak.p.1384	0.164108	0.0148678	149.006		652.758
Peak.n.710	0.142925	0.0148678	538.424		211.45
Peak.p.201	0.263117	0.0151164	520.336		272.103
Peak.n.1227	0.194072	0.0151164	148.053		503.41	HMDB00930, HMDB00567, 3H1INDANONE, C05608, DIHYDROCOUMARIN, C17268, cinnamic acid, CPD-9949, C07728, C07720, COUMARALDEHYDE, C10438, C00423, ISOCHROMANONE, C02274
Peak.n.860	0.156475	0.0152829	440.35		214.918
Peak.p.775	0.153468	0.0152829	177.051		629.865
Peak.p.559	-0.143692	0.0152829	243.072		556.689
Peak.n.365	-0.432645	0.0154847	370.182		217.973	HMDB02759, HMDB06278
Peak.p.960	0.289013	0.0156721	517.315		412.515
Peak.n.695	0.114272	0.0159779	448.356		211.156	C15791, C15793, CPD-719, CPD-716
Peak.n.205	0.144667	0.0160203	270.22		208.915	HMDB10733, methyl-oxo-pentadecanoic acid, oxohexadecanoic acid, hydroxy-hexadecenoic acid
Peak.n.603	-1.52378	0.0161192	226.067		236.092
Peak.n.846	0.191494	0.0161192	274.222		207.36
Peak.p.586	0.11767	0.0162027	520.413		209.289
Peak.p.1251	0.114838	0.0162027	501.404		210.821
Peak.n.522	1.80417	0.0162946	202.03		233.172
Peak.p.129	0.423385	0.0164589	279.084		604.574
Peak.n.734	0.257305	0.016545	582.337		275.242
Peak.p.694	0.134882	0.0166272	518.319		276.085
Peak.p.440	0.245263	0.0166543	205.087		552.431
Peak.p.265	-0.245479	0.0168358	246.085		482.707	HMDB00497, HMDB11160
Peak.p.437	0.202098	0.0172978	245.116		552.154	N-ACETYL-TRYPTOPHANAMIDE
Peak.n.883	0.126561	0.0172978	512.408		211.269
Peak.p.585	0.0836772	0.0172978	250.193		212.299	CPD-12586, CPD-7988, CONTAMINANTDB_0088, C16503
Peak.p.443	-0.476756	0.017719	246.137		456.288	C09213
Peak.n.889	-0.328422	0.0177259	102.032		469.539	methylmalonate semialdehyde, C06002, C06005, 2-ketobutyric acid, SUCC-S-ALD, HMDB00060, HMDB00005, 3-KETOBUTYRATE, HMDB02217, 2-OXOBUTANOATE, StdMix1_88, succinic acid semialdehyde, C00349, CPD-3573, HMDB01172, HMDB01259, StdMix3_6, StdMix2_62, C00232, HMDB03381, C00109, CH3-MALONATE-S-ALD, C00164
Peak.p.1007	0.203681	0.0177259	590.453		205.589
Peak.p.1231	1.79809	0.0185149	335.08		604.554	C09575
Peak.p.872	0.175356	0.0186972	279.228		205.149
Peak.n.997	0.143583	0.0186972	225.687		210.078
Peak.n.1426	0.182366	0.0187452	416.329		231.141	C08914, C08913, HMDB12453, HMDB12457, HMDB12459, HMDB00430, C08127, C08128, CPD-1946, C01673, C03963, HMDB02197, HMDB06720, C15633, HMDB06226, C17331, C17332, C17333, C17336, C17339, C07712, CPD-7237, HMDB01903, C12919, HMDB01420, CALCITRIOL, C12929, C12927, C12928, C12925, C12926, C12923, C12924, C12921, C12922, C12920, C12932, C12930, C12931, C16819, C16493
Peak.p.435	0.263207	0.0188928	226.072		552.023	CPD-659
Peak.p.631	0.11115	0.0197386	675.539		250.473
Peak.p.1130	0.181991	0.019952	572.444		204.977
Peak.n.1413	0.500019	0.0201937	137.042		517.644
Peak.n.877	0.148445	0.0203702	224.68		210.696
Peak.n.270	0.520037	0.0203851	136.039		517.516	HMDB00157, hypoxanthine, CPD-9024, CPD-9023, CPD-9017, StdMix2_1, C00262, HYPOXANTHINE
Peak.p.816	-1.94067	0.0205801	375.252		236.043	CONTAMINANTDB_0142
Peak.n.914	0.158743	0.0205801	541.443		209.091
Peak.p.1533	-0.143879	0.0205973	356.242		833.59	PEPTIDE_220
Peak.p.1480	0.158845	0.0208512	744.585		233.532
Peak.n.1043	0.264998	0.0208614	529.302		287.097
Peak.p.5	-0.241392	0.0208614	84.0209		514.657	C06144, C17602, C17601, C02648, 4-HYDROXY-2-BUTYNAL
Peak.p.219	0.19347	0.0208614	183.066		271.957	CARBOXYETHYL-3-5-CYCLOHEXADIENE-1-2-DIOL, StdMix2_44
Peak.n.1006	0.172037	0.0208614	186.053		422.457	CPD-337
Peak.n.947	0.23183	0.0213126	481.317		264.851	HMDB10381, GPC(15:0/1), GPE(18:0/1), lysoPC(15:0), lysoPE(18:0), HMDB11129, HMDB11130, CPD0-2223, CPD0-2152
Peak.n.556	0.12879	0.0215035	247.912		208.794
Peak.n.407	0.312222	0.021555	164.047		274.373	COUMARATE, C06738, PHENYL-PYRUVATE, HMDB02641, HMDB00205, HMDB12225, C01775, C01772, HMDB02035, PHENYLPYRUVATE, StdMix1_50, C05838, HMDB01713, C10945, coumarate, C07114, C00811, C12621, StdMix2_60, phenylpyruvate, C02763, C00166
Peak.p.1116	0.103966	0.0216699	485.408		210.529
Peak.p.864	0.21592	0.0216836	585.497		206.806
Peak.n.951	0.140341	0.0218309	259.7		210.675
Peak.p.508	-0.211002	0.0220984	141.079		503.281	C08287, CPD-9699, C07505, C10128, C16821
Peak.n.400	0.263484	0.0221286	156.115		241.512	C08471, C08501, HMDB04362, CPD-10806, NONANE-46-DIONE, C02445
Peak.p.1113	-0.165353	0.0224892	229.151		488.431
Peak.p.1083	-1.70029	0.0226302	885.393		220.098
Peak.n.1052	0.16731	0.0228133	217.17		211.193
Peak.n.577	0.233052	0.0229127	295.227		207.344	CPD-8204, CPD-10320, CPD-12192, 18-OXOOLEATE
Peak.p.648	0.187637	0.0232105	178.055		629.269
Peak.n.1197	0.204139	0.0232989	553.479		205.582
Peak.p.808	-0.258588	0.0233755	482.639		218.724
Peak.n.736	0.16451	0.0233755	283.227		207.936
Peak.p.1300	0.14265	0.0233844	556.452		208.538
Peak.p.256	0.139136	0.0235107	109.064		620.485	C10133
Peak.n.995	0.144928	0.0242731	267.196		212.378
Peak.n.1116	0.188169	0.0245372	267.233		204.918
Peak.n.1041	0.134707	0.0251077	424.356		213.476
Peak.p.409	0.0986072	0.0251588	116.059		652.007	CPD-9013, C16622
Peak.p.1094	0.201749	0.0251735	146.069		426.864	ISOGLUTAMINE, GLN, CPD0-1914, ALA-GLY, HMDB00641, PEPTIDE_129, HMDB02031, HMDB06899, StdMix1_30, glutamine, C05100, C00819, C00303, StdMix2_40, C00064, HMDB03423, CONTAMINANTDB_0041, GLUTAMIDE, C16673
Peak.p.1084	-1.60258	0.0254874	886.396		220.089
Peak.n.630	0.153781	0.025803	220.175		214.75
Peak.n.444	0.130251	0.0259295	106.027		545.953	glyceric acid, HMDB00139, HMDB06372, GLYCERATE, C00258
Peak.p.596	0.12316	0.0259658	479.361		212.307
Peak.p.1117	0.109983	0.0262683	484.396		210.753
Peak.n.179	-0.182003	0.026316	158.131		239.972	HMDB00847, HMDB00798, C01601
Peak.p.1195	-0.131186	0.026316	278.152		233.817	CPD-11962, C03343, C15205, alpha-CEHC, HMDB01518, LMPR0103200001, C14214, CONTAMINANTDB_0098
Peak.n.1229	0.305053	0.0272832	263.628		254.171
Peak.p.140	-0.885038	0.0275796	145.074		568.53	C04076, N-butyrylglycine, HMDB00808, HMDB00730, HMDB12131, HMDB12151, 5-HYDROXY-PIPECOLATE, C03656, C05825, C03239, CPD-159, HMDB03681, C02946, HMDB01263, 2-KETO-6-AMINO-CAPROATE
Peak.p.1006	0.187545	0.0279219	617.471		203.188
Peak.n.216	0.180845	0.0285177	204.09		557.325	HMDB00929, TRP, tryptophan, StdMix1_14, C07839, C10968, C10743, C00807, C00806, C14916, C00525, C00078, D-TRYPTOPHAN, STD_TRYPTOPHAN
Peak.n.1270	0.156971	0.0285177	579.317		278.429
Peak.p.135	-0.253313	0.0289033	187.096		618.467	CPD-12430
Peak.n.748	0.153787	0.0289788	219.167		215.168
Peak.p.910	0.168019	0.0297612	196.146		212.452	C08486, C11338, dodecynoic acid, CPD-9758, LMPR0102090045, C09837, C09861, C09863, 7-(2-cyclopentenyl)-heptanoic acid, C12306, C12301, C12302, C12300, LMPR0102010009, LMPR0102120020
Peak.p.888	0.131777	0.0297612	522.429		207.552
Peak.p.884	0.107085	0.0298387	535.424		208.687
Peak.p.433	0.217158	0.0298658	205.093		552.155
Peak.n.697	0.224427	0.0306512	575.464		206.09
Peak.p.1415	0.202662	0.0306512	119.058		630.3	CPD0-1507, CPD-8151, HOMO-SER, HMDB00719, HMDB00167, CPD0-1379, C11108, CPD-12255, THR, D-THREONINE, STD_THREONINE, CPD-10303, HMDB04041, L-ALLO-THREONINE, C03678, StdMix1_28, threonine, C05519, homoserine, C00820, C12317, AMINOBUT-CPD, CPD-390, StdMix2_33, C00263, C00188, C02115, 2-METHYL-L-SERINE
Peak.n.698	0.167104	0.0306512	241.181		218.308	CPD-12642
Peak.p.1296	0.0914225	0.0308441	516.381		209.394
Peak.n.1379	0.344688	0.0310363	156.115		414.577	C08471, C08501, HMDB04362, CPD-10806, NONANE-46-DIONE, C02445
Peak.n.508	0.140953	0.0314355	259.199		210.372
Peak.p.1115	0.136692	0.0317939	557.466		206.157
Peak.n.767	0.195548	0.0320312	252.209		211.443	HMDB00480, HMDB00477, 11-(2-cyclopentenyl)-hendecanoic acid, hexadecynoic acid, hexadecadienoic acid, C16795
Peak.p.431	0.205505	0.0326961	204.09		552.263	HMDB00929, TRP, tryptophan, StdMix1_14, C07839, C10968, C10743, C00807, C00806, C14916, C00525, C00078, D-TRYPTOPHAN, STD_TRYPTOPHAN
Peak.p.1534	-0.141404	0.0326961	178.121		832.936
Peak.n.582	0.229272	0.0332511	152.033		539.52	HMDB00786, HMDB00292, xanthine, StdMix1_63, C07599, XANTHINE, C00385, HMDB01182
Peak.p.126	0.194797	0.0332511	129.043		479.304	pyroglutamic acid/5-oxoproline, C04282, C04281, PYRROLINE-HYDROXY-CARBOXYLATE, 5-OXOPROLINE, HMDB00805, HMDB00267, HMDB02234, C01877, C01879, HMDB01843, HMDB01369, CPD0-2462, StdMix2_11, C02237
Peak.n.1069	0.153858	0.0332511	841.548		235.64
Peak.p.885	0.146961	0.0332511	553.435		209.751
Peak.n.1370	0.219888	0.0333654	434.243		275.442	C03630, L-1-LYSOPHOSPHATIDATE, HMDB07856, HMDB07852
Peak.p.1018	0.228248	0.0337877	591.486		203.643
Peak.n.955	0.177137	0.0338689	273.214		208.413
Peak.n.1173	-0.112969	0.0339763	185.105		531.955	CPD0-1483, HMDB06348, HMDB06548, CPD-9779, C10858, C10356, C12449
Peak.n.791	0.151838	0.0342605	196.146		219.262	C08486, C11338, dodecynoic acid, CPD-9758, LMPR0102090045, C09837, C09861, C09863, 7-(2-cyclopentenyl)-heptanoic acid, C12306, C12301, C12302, C12300, LMPR0102010009, LMPR0102120020
Peak.n.628	0.148871	0.0342605	251.201		206.669
Peak.p.478	0.125755	0.0342605	743.582		233.171	GPC(34:2/1), HMDB08028, HMDB08093, HMDB08126, HMDB11151, HMDB11272, HMDB11240, HMDB11209, HMDB11210, HMDB11305, HMDB07997, HMDB07996, GPC(34:1)?
Peak.p.1309	0.203372	0.0345737	132.09		898.808	CPD0-1941, HMDB00214, L-ORNITHINE, C01602, C01603, 24DINH2-PENTANOATE, C03943, STD_ORNITHINE, CPD-217, C00516, C00515, StdMix2_51, C00077, HMDB03374, ornithine
Peak.p.1471	1.56152	0.035423	482.357		278.247
Peak.p.594	0.096579	0.0355052	509.408		209.525
Peak.n.1458	0.116827	0.0357843	736.538		252.529
Peak.n.418	0.308958	0.0358816	255.63		218.591
Peak.p.1335	0.116964	0.0362091	440.35		213.323
Peak.n.243	0.230952	0.0367221	116.011		640.118	FUM, HMDB00176, fumarate, HMDB00134, C01384, StdMix1_53, maleic acid, StdMix3_9, CPD-546, C00122, C02150
Peak.p.902	0.146989	0.0367459	315.277		207.805	CPD-10693
Peak.n.654	0.0871733	0.0367459	165.072		563.21
Peak.n.563	0.121105	0.0367825	213.186		211.783
Peak.n.851	0.101552	0.0369029	450.371		210.564	C15802, CPD-723
Peak.n.142	0.181836	0.0375985	92.0472		523.32	GLYCEROL, HMDB00131, StdMix1_10, C00116
Peak.n.1398	0.191966	0.0376684	113.048		642.55	pyrroline carboxylate, CPD0-1103, L-DELTA1-PYRROLINE_5-CARBOXYLATE, C03912, C03564, C03565, HMDB06875, C07275, l-delta(1)-pyrroline_5-carboxylate, HMDB01301, GLUTARIMIDE, C04322
Peak.n.763	0.278933	0.0376857	479.302		268.377	CPD-8355, lysoPE(18:1), HMDB11506, HMDB11505, HMDB11475, HMDB11476
Peak.p.964	-0.108097	0.0379229	186.109		524.597
Peak.n.881	0.1588	0.0382873	366.277		221.291
Peak.n.396	0.167193	0.0398037	279.734		203.646
Peak.n.264	0.0923664	0.0398037	223.17		210.632	CPD0-1159
Peak.n.817	0.283864	0.039816	212.069		413.487	HMDB00913, CPD-11831, C11155, CPD-6542, C10674, vanillactic acid
Peak.n.215	0.245526	0.039844	296.235		208.445	HMDB10223, C08318, C08368, HMDB04670, HMDB04667, HMDB04702, HMDB04701, HMDB06939, epoxyoctadecenoic acid, hydroxyoctadecadienoic acid, C14826, C14825, C14767, C14762
Peak.p.900	1.36364	0.0400639	627.507		206.992
Peak.p.398	0.162994	0.0400639	197.078		651.773
Peak.n.870	0.459647	0.0402351	158.021		517.188	CPD0-2359
Peak.n.1114	0.142535	0.0404265	262.724		207.956
Peak.p.509	-0.280549	0.0407629	185.069		494.753
Peak.p.1550	0.105688	0.0422324	519.4		209.196
Peak.n.617	0.143988	0.0427225	290.254		205.365
Peak.p.1238	-0.0947204	0.0427225	218.019		637.956
Peak.p.1017	0.256242	0.0431446	609.497		205.358
Peak.n.20	-0.204759	0.0433748	118.063		312.881	HMDB00410, HMDB00407, HMDB00531, HMDB00642, HMDB00754, HMDB00396, HMDB00351, HMDB00354, HMDB02011, HMDB01863, HMDB01987, C02804
Peak.p.3	-0.186156	0.0433748	203.116		516.596	acetylcarnitine, HMDB00201, O-ACETYLCARNITINE, StdMix3_20, (-)o-acetylcarnitine
Peak.n.981	0.747047	0.0434693	140.992		651.235
Peak.p.903	0.129185	0.0437179	496.413		207.241
Peak.n.1084	0.167153	0.0447866	723.521		234.887	HMDB09214, HMDB09444, HMDB09411, HMDB09150, HMDB09182, HMDB09183, HMDB09149, HMDB11353, HMDB11352, HMDB11379, HMDB11410, HMDB11411, HMDB11443, HMDB11444
Peak.p.1398	1.39913	0.044961	549.38		262.761	HMDB10391, GPC(20:1//1), HMDB11148
Peak.n.453	0.165893	0.0451385	558.465		203.727
Peak.p.692	0.105461	0.0454671	517.315		276.33
Peak.n.651	-0.126892	0.0455687	132.098		525.322
Peak.n.1239	0.179348	0.0457628	93.0506		520.747
Peak.p.254	0.127665	0.0458622	155.07		619.664	HIS, C06419, HMDB00177, C01162, StdMix1_43, CPD-12151, histidine, BACIMETHRIN, C00769, C00768, STD_HISTIDINE, CPD-670, C00135
Peak.n.694	0.162471	0.0461117	268.204		212.92	3-oxo-2-pentyl-cyclopentanehexanoic acid
Peak.n.673	0.187576	0.0462011	147.916		411.333
Peak.n.939	0.105956	0.0464955	867.564		234.168
Peak.n.892	0.124925	0.04659	240.191		208.352
Peak.p.432	0.194955	0.0466966	187.063		552.211	HMDB00734, CPD-11578, indoleacrylic acid
Peak.p.927	0.260197	0.0472558	122.048		414.663	C01950, EPYRIDALDOX, HMDB01406, StdMix2_10, C00153, NIACINAMIDE, C02421, niacinamide
Peak.n.1002	0.245897	0.0472592	313.234		240.831
Peak.n.852	0.173842	0.0472592	256.706		210.809
Peak.p.317	-0.147432	0.0472592	129.054		566.198
Peak.n.751	0.16002	0.0475257	559.469		203.865
Peak.n.1186	0.158258	0.0476637	539.427		211.617
Peak.n.432	-0.0943552	0.0477191	240.024		647.796	CPD0-1564, HMDB00192, StdMix3_39, C01420, cystine, StdMix1_40, C00491, CYSTINE, STD_Cystine
Peak.p.860	0.174501	0.0481148	296.235		208.142	HMDB10223, C08318, C08368, HMDB04670, HMDB04667, HMDB04702, HMDB04701, HMDB06939, epoxyoctadecenoic acid, hydroxyoctadecadienoic acid, C14826, C14825, C14767, C14762
Peak.p.731	0.140585	0.0482299	780.549		231.815
Peak.n.595	0.129887	0.048285	234.693		211.501
Peak.n.258	-0.0587869	0.048285	115.944		243.448
Peak.p.1068	0.136081	0.0488522	155.069		659.926	HIS, C06419, HMDB00177, C01162, StdMix1_43, CPD-12151, histidine, BACIMETHRIN, C00769, C00768, STD_HISTIDINE, CPD-670, C00135
Peak.n.1326	0.16146	0.049209	191.017		490.054
Peak.p.4	-0.187489	0.049334	204.119		516.212
