# Supplementary material for: Changes in Plasma Itaconate Elevation in Early Rheumatoid Arthritis Patients Elucidates Disease Activity Associated Macrophage Activation
Source: Metabolites. 2020 Jun 10;10(6):241. doi: 10.3390/metabo10060241 (PMC7344783; doi:10.3390/metabo10060241)
Supplement: Supplementary file 1 [file metabolites-10-00241-s001.zip › Supp 3 - Authentication standards_GB.xlsx]

## Sheet: STD1
Supplementary File 1: Authentication Standards
	B1STD1_1 RT/minutes	B1STD1_2 RT/minutes	B2STD1_1 RT/minutes	B2STD1_2 RT/minutes	B3STD1_1 RT/minutes	B3STD1_2 RT/minutes	B4STD1_1 RT/minutes	B4STD1_2 RT/minutes	B5STD1_1 RT/minutes	B5STD1_2 RT/minutes		Mean RT/minutes	standard deviation RT/minutes	RSD RT
Melatonin	278.4	277.2	276	277.8	285.6	279.6	275.4	276.6	278.4	279		278.4	2.85657	1.02607
Phenylhydrazine	303.6	301.8	303	301.8	310.2	306.6	303	303	304.2	303		304.02	2.56203	0.842718
Nicotinate	410.4	409.8	404.4	405	418.8	406.2	414.6	415.8	415.8	414.6		411.54	5.10255	1.23987
Pyridoxine	435	433.2	436.2	436.2	453.6	443.4	435	437.4	439.2	436.2		438.54	5.98298	1.36429
riboflavin	449.4	451.2	456.6	456.6	472.2	465	452.4	454.2	454.2	452.4		456.42	7.00314	1.53436
Adenine	493.8	493.8	497.4	497.4	513	507.6	494.4	496.2	499.2	496.2		498.9	6.37652	1.27812
Creatinine	496.2	496.2	499.8	501	517.2	510	496.8	498.6	499.2	498.6		501.36	6.84807	1.3659
L-Phenylalanine	496.2	498	497.4	498.6	515.4	507.6	499.2	501	501.6	499.8		501.48	5.81584	1.15974
L-Leucine	520.2	519.6	522	523.2	541.2	534.6	521.4	522.6	524.4	522		525.12	7.04727	1.34203
Inosine	525	524.4	529.2	530.4	547.8	540.6	528	528.6	529.2	528		531.12	7.33648	1.38132
Selenomethionine	536.4	535.8	539.4	539.4	557.4	550.8	538.8	540	540.6	539.4		541.8	6.8352	1.26157
L-Methionine	538.8	538.8	540.6	541.8	559.2	552	540	542.4	543	541.8		543.84	6.57997	1.20991
Imidazole-4-acetate	529.8	528	526.8	526.8	542.4	534.6	535.2	535.2	535.2	534		532.8	4.92341	0.924064
L-Tryptophan	553.8	553.8	556.8	556.8	576.6	568.2	555	556.8	558.6	556.8		559.32	7.32557	1.30973
N-Acetyl-D-glucosamine	549	549	552	553.2	571.8	564.6	550.2	551.4	553.2	550.2		554.46	7.58657	1.36828
Cytidine	560.4	559.2	562.8	564.6	583.2	577.2	561.6	562.8	564.6	562.8		565.92	7.83735	1.38489
Guanine	588	586.8	590.4	592.2	611.4	605.4	589.2	590.4	591	590.4		593.52	8.1132	1.36696
L-Valine	568.8	568.8	571.8	571.8	591.6	584.4	570	571.8	573.6	571.8		574.44	7.49507	1.30476
L-Proline	579	579	583.2	583.2	603	595.8	579	582	582	580.2		584.64	8.12994	1.39059
sn-glycero-3-Phosphocholine	606.6	606.6	609.6	610.8	630.6	625.8	607.8	610.2	609.6	608.4		612.6	8.41903	1.37431
L-Threonine	616.2	616.8	619.8	619.8	639.6	633.6	619.2	621	621.6	619.8		622.74	7.62339	1.22417
trans-4-Hydroxy-L-proline	619.2	619.8	623.4	625.2	645	638.4	621.6	623.4	624	622.2		626.22	8.50435	1.35805
N2-Acetyl-L-lysine	625.2	624.6	630	631.2	651	645	625.8	628.8	629.4	627		631.8	8.9174	1.41143
D-Glucosamine	639.6	639.6	648.6	650.4	669.6	663.6	639.6	641.4	644.4	641.4		647.82	10.6848	1.64934
L-Glutamine	630.6	631.2	633.6	634.8	654.6	648.6	632.4	634.8	635.4	633.6		636.96	7.996	1.25534
Taurine	639.6	639.6	642.6	642.6	661.2	653.4	643.8	645	645.6	643.8		645.72	6.67413	1.03359
L-Aspartate	619.2	618.6	616.8	617.4	634.2	629.4	623.4	623.4	624	621		622.74	5.52413	0.887068
L-Asparagine	636.6	636	639	640.2	660	652.2	639.6	641.4	642	639.6		642.66	7.54957	1.17474
beta-Alanine	644.4	645	648.6	649.2	669.6	664.8	645	647.4	648	646.2		650.82	8.8546	1.36053
Glycine	655.8	656.4	660	660	681	675	657.6	660	660	657.6		662.34	8.52033	1.2864
L-Serine	655.8	655.2	658.8	658.8	679.8	673.8	657.6	658.8	658.8	657.6		661.5	8.28613	1.25263
L-Citrulline	653.4	652.8	657.6	657.6	678.6	673.8	654.6	656.4	657	655.2		659.7	8.923	1.35259
L-Lysine	927	928.2	958.8	963.6	991.8	996	922.2	925.2	925.8	926.4		946.5	28.9403	3.05761
L-Arginine	993	997.2	1029	1035	1067.4	1071.6	985.2	990.6	991.8	991.2		1015.2	33.2229	3.27255
Phenolsulfonphthalein	306.6	306.6	301.2	298.8	306	298.2	309	309.6	310.8	308.4		305.52	4.53255	1.48355
Thymidine	402	402	403.8	404.4	421.8	413.4	402	404.4	406.2	403.8		406.38	6.37526	1.56879
MOPS	393.6	393	384.6	384	396	384	399.6	400.8	401.4	398.4		393.54	7.01684	1.783
Pyruvate	432	431.4	426.6	426	438.6	429	436.8	438	438.6	435.6		433.26	4.91894	1.13533
Deoxyuridine	442.2	442.8	445.8	445.8	462.6	455.4	442.8	445.8	447	444.6		447.48	6.498	1.45213
4-Coumarate	433.2	432.6	430.8	429.6	444	435	438	439.2	439.8	436.8		435.9	4.49222	1.03056
pyrazinoate	452.4	451.8	448.2	448.8	462.6	453	458.4	458.4	459	457.2		454.98	4.80042	1.05508
(R)-3-Hydroxybutanoate	460.2	459.6	456	454.8	469.2	459.6	464.4	466.2	466.2	465		462.12	4.76487	1.03109
3'_5'-Cyclic AMP	465	465	463.8	463.8	478.2	469.8	471	471	471.6	469.8		468.9	4.55412	0.971235
Uridine	499.2	499.8	503.4	502.8	519	511.8	499.8	501.6	503.4	501.6		504.24	6.30048	1.2495
D-glucose	627.6	628.8	661.8	633	669	663	640.2	642	642.6	642		645	14.6751	2.27522
Orotate	496.8	495.6	492	492	506.4	495.6	502.8	502.8	502.2	500.4		498.66	4.95136	0.992934
L-Rhamnose	538.2	534	540	544.8	564.6	551.4	539.4	541.8	540	542.4		543.66	8.64616	1.59036
Xanthine	540.6	539.4	538.8	540	555.6	547.8	544.8	546	546	543.6		544.26	5.08685	0.934635
3_4-Dihydroxyphenylacetate	585.6	586.2	583.8	582.6	597	588.6	592.2	593.4	594	591		589.44	4.80999	0.816027
Phthalate	597	596.4	595.8	596.4	612	603.6	602.4	603.6	604.2	601.2		601.26	5.07109	0.843411
D-Gluconic acid	598.2	597.6	593.4	594	612	603.6	604.8	603.6	601.8	598.8		600.78	5.57889	0.928608
UMP	585.6	583.8	585	585	602.4	595.2	589.8	591	591.6	588.6		589.8	5.71314	0.968658
L-Glutamate	607.2	606	606	606.6	623.4	616.2	610.8	612.6	611.4	610.2		611.04	5.45674	0.893025
Methylmalonate	617.4	616.2	618	618	634.8	627.6	622.2	622.8	623.4	621.6		622.2	5.62139	0.90347
CMP	615.6	616.2	618	618	634.8	628.8	621	621.6	622.2	620.4		621.66	5.95617	0.958108
(R)-2-Hydroxyglutarate	621	620.4	622.8	622.8	640.2	634.2	626.4	628.2	627	626.4		626.94	6.17382	0.984754
L-Cysteate	647.4	646.8	646.8	646.8	664.2	656.4	651.6	653.4	652.8	652.2		651.84	5.50781	0.844964
D-ribose 5-phosphate	632.4	633	634.2	634.2	652.8	646.8	637.8	637.8	638.4	637.8		638.52	6.49184	1.0167
Malonate	642.6	642	644.4	644.4	663	656.4	648	648	648.6	646.8		648.42	6.55469	1.01087
D-Galacturonate	658.2	657.6	659.4	661.2	678	673.2	659.4	662.4	663	659.4		663.18	6.85886	1.03424
Fumarate	651.6	651	654.6	653.4	672	664.2	655.8	657	657.6	655.8		657.3	6.35138	0.966283
D-glucose 6-phosphate	658.2	658.8	660.6	661.2	679.2	673.2	661.8	664.8	664.2	662.4		664.44	6.68251	1.00574
D-Galactarate	674.4	673.8	677.4	677.4	696	689.4	679.8	680.4	681	679.2		680.88	6.84573	1.00542
Phosphoenolpyruvate	681	683.4	686.4	688.2	709.8	706.8	693	694.8	691.8	690.6		692.58	9.33402	1.34772
cis-Aconitate	693.6	693.6	697.8	700.8	718.8	713.4	697.8	699.6	699	698.4		701.28	8.25009	1.17643
D-Erythrose	549.6	549.6	551.4	553.8	572.4	565.2	549.6	552	552.6	550.8		554.7	7.74726	1.39666
Maltose	658.2	655.8	661.8	662.4	683.4	678	658.2	661.2	660.6	659.4		663.9	9.15751	1.37935
2-oxobutanoate	370.2	369.6	363.6	362.4	375.6	367.2	375	375	378	374.4		371.1	5.36843	1.44663
2-Methylcitrate	684	684.6	685.2	686.4	706.2	699.6	695.4	693.6	694.2	690.6		691.98	7.27764	1.05171
3-Hydroxyphenylacetate	461.4	461.4	457.2	457.8	470.4	462	466.2	467.4	468	466.2		463.8	4.47214	0.964238

## Sheet: STD2
	B1STD2_1 RT/minutes	B1STD2_2 RT/minutes	B2STD2_1 RT/minutes	B2STD2_2 RT/minutes	B3STD2_1 RT/minutes	B3STD2_2 RT/minutes	B4STD2_1 RT/minutes	B4STD2_2 RT/minutes	B5STD2_1 RT/minutes	B5STD2_2 RT/minutes		Mean RT/minutes	standard deviation RT/minutes	RSD RT
Thiopurine S-methylether	375.6	375.6	374.4	376.2	388.8	378.6	377.4	376.8	379.8	379.2		378.24	4.09097	1.08158
5'-Methylthioadenosine	388.2	387	389.4	390.6	405.6	398.4	387.6	388.8	390.6	388.8		391.5	5.90085	1.50724
Nicotinamide	401.4	402	403.8	403.8	418.2	411	402.6	403.8	406.8	405		405.84	5.14743	1.26834
4-(beta-Acetylaminoethyl)imidazole	414	417	418.8	418.8	434.4	429.6	415.2	416.4	419.4	417.6		420.12	6.57754	1.56563
Pyridoxal	426.6	427.8	427.2	426.6	441.6	433.2	430.2	431.4	433.2	431.4		430.92	4.55016	1.05592
6-Methylaminopurine	436.8	436.8	439.8	441	455.4	449.4	437.4	439.2	441	439.2		441.6	6.0597	1.37222
Deoxyadenosine	442.8	442.8	443.4	446.4	461.4	454.2	441	444	445.8	444		446.58	6.33751	1.41912
Pantothenate	440.4	439.2	435.6	435	450.6	441.6	445.2	445.2	447	444		442.38	4.97232	1.12399
Picolinic acid	453	453	453	454.8	469.2	461.4	460.8	457.8	458.4	459		458.04	5.06912	1.1067
Adenosine	468.6	468.6	474.6	474.6	490.2	483	471	472.2	473.4	471		474.72	6.82232	1.43712
Hypoxanthine	513.6	513.6	514.8	516.6	533.4	526.2	515.4	516.6	519	517.2		518.64	6.33845	1.22213
5-Oxoproline	495.6	495.6	493.8	493.8	508.2	499.2	500.4	501.6	502.2	501.6		499.2	4.5607	0.913602
HEPES	492	492	489.6	490.2	504	495.6	496.2	498	498.6	496.8		495.3	4.43847	0.896117
L-Kynurenine	523.2	523.8	526.2	528	543.6	537.6	525.6	526.8	527.4	525.6		528.78	6.55469	1.23959
Betaine	533.4	533.4	536.4	536.4	555	548.4	534.6	535.8	536.4	534.6		538.44	7.25093	1.34666
cytosine	552	552.6	554.4	555.6	574.8	567	553.2	554.4	556.8	553.8		557.46	7.44822	1.3361
FAD	505.8	502.2	501	501.6	519.6	511.8	509.4	508.2	512.4	508.2		508.02	5.76229	1.13426
L-isoleucine	549.6	548.4	551.4	553.2	570	564.6	550.8	552	553.2	550.8		554.4	7.07107	1.27545
Methylcysteine	544.2	544.8	546.6	546.6	563.4	556.2	548.4	549	550.8	548.4		549.84	5.85286	1.06447
Ala-Gly	538.2	537	532.8	532.8	549	540	543	543	544.2	542.4		540.24	5.13965	0.951364
Guanosine	577.8	578.4	582	581.4	601.2	595.8	579.6	591.6	592.8	577.8		585.84	8.65887	1.47803
dAMP	541.8	541.2	541.2	541.8	557.4	550.8	546	546.6	547.8	546		546.06	5.1416	0.941581
N(pi)-Methyl-L-histidine	564.6	563.4	565.2	565.8	583.8	576	567	567.6	570	567.6		569.1	6.2562	1.09931
L-Carnitine	586.8	586.2	589.2	591	609	598.2	587.4	589.2	590.4	589.2		591.66	6.95385	1.17531
Eflornithine	589.2	591	593.4	595.2	613.8	607.2	591	592.8	594	592.8		596.04	7.9609	1.33563
L-Tyrosine	589.2	588.6	591.6	594	609	544.8	589.8	591.6	594	591.6		588.42	16.4026	2.78756
4-Trimethylammoniobutanoate	582	580.8	584.4	588.6	604.8	599.4	585	585.6	587.4	585.6		588.36	7.69519	1.30791
S-Adenosyl-L-homocysteine	576.6	578.4	580.8	581.4	598.8	593.4	577.2	579	580.2	579		582.48	7.43935	1.27719
AMP	540.6	541.2	540	541.8	556.2	549.6	547.2	546.6	546.6	546		545.58	4.98036	0.912856
Glycylglycine	588	588.6	582	581.4	597.6	591	592.2	594	594	592.8		590.16	5.23985	0.887869
L-Alanine	630.6	631.2	634.8	636.6	656.4	651	633	634.2	635.4	634.2		637.74	8.6969	1.36371
Choline phosphate	612	610.2	609.6	611.4	630	622.2	616.8	616.8	618	615.6		616.26	6.24468	1.01332
dCMP	598.2	597.6	598.2	598.8	615	608.4	602.4	603	604.2	603		602.88	5.45381	0.904625
L-homoserine	634.2	634.2	638.4	639.6	658.8	653.4	636.6	638.4	639	638.4		641.1	8.22314	1.28266
N-Acetylornithine	631.8	631.2	636	636.6	656.4	652.2	633	634.2	635.4	634.2		638.1	8.7647	1.37356
4-Aminobutanoate	645.6	645	648.6	651	671.4	666	645.6	648.6	649.2	648.6		651.96	9.10912	1.39719
Choline	933	941.4	999	1009.2	1054.2	1066.8	904.8	913.8	921	921.6		966.48	60.6022	6.2704
L-Ornithine	870	868.8	894	897.6	923.4	925.2	865.8	868.2	869.4	868.2		885.06	23.5567	2.66159
Taurocholate	273.6	271.8	267.6	266.4	273.6	265.8	285	280.8	285.6	285		275.52	7.96392	2.8905
Phenylacetylglycine	353.4	352.2	347.4	343.8	347.4	323.4	355.2	355.2	358.2	357		349.32	10.2286	2.92814
D-Threose	480	477	474	469.2	484.2	480	485.4	483	485.4	484.8		480.3	5.46443	1.13771
succinate semialdehyde	478.2	478.8	472.2	472.8	486	475.8	481.8	483	484.2	483.6		479.64	4.85963	1.01318
N-Acetylglutamine	496.2	495	493.2	493.2	507	499.8	501	501	502.8	499.8		498.9	4.45646	0.893256
D-Ribose	559.8	559.2	559.8	564	529.2	521.4	523.8	564.6	565.2	564.6		551.16	18.42	3.34204
FMN	506.4	507.6	504	505.8	521.4	513.6	512.4	514.8	514.2	511.2		511.14	5.27219	1.03146
L-Gulono-1_4-lactone	540	540.6	537	538.8	553.2	545.4	546.6	547.2	547.2	545.4		544.14	4.93518	0.906969
Orotidine	552.6	554.4	550.8	551.4	565.2	556.8	559.2	561	560.4	558		556.98	4.67376	0.839125
N-Acetylneuraminate	571.2	570.6	570	570.6	588	580.2	576.6	577.2	578.4	576		575.88	5.64128	0.979592
dUMP	571.2	571.8	571.2	571.8	588	581.4	576.6	577.2	578.4	577.2		576.48	5.38739	0.934532
allantoin	637.2	638.4	640.2	641.4	660.6	652.8	638.4	640.2	640.8	640.2		643.02	7.54745	1.17375
dIMP	586.2	586.8	586.2	588	605.4	598.8	592.8	593.4	593.4	592.2		592.32	6.14361	1.03721
sn-Glycerol 3-phosphate	608.4	608.4	609	609.6	627	620.4	613.2	615	615	613.8		613.98	5.9602	0.970748
sucrose	633.6	634.8	637.8	640.2	659.4	654	634.8	636.6	638.4	637.2		640.68	8.75351	1.36628
Succinate	619.8	618	620.4	621	637.8	631.2	624.6	626.4	625.8	625.2		625.02	5.94676	0.951452
D-Glucuronolactone	633.6	633.6	634.2	636	653.4	646.2	638.4	640.2	639.6	639		639.42	6.2357	0.975212
Mesaconate	631.2	630.6	633	632.4	649.2	643.8	636	637.8	637.2	636		636.72	5.85696	0.919865
2-Oxoglutarate	409.8	408.6	401.4	402	411.6	400.2	415.8	415.8	416.4	414.6		409.62	6.38154	1.55792
GMP	628.8	625.8	629.4	630	646.8	642.6	632.4	634.8	634.8	632.4		633.78	6.45631	1.0187
(S)-Malate	648.6	647.4	649.2	650.4	668.4	663	654	654.6	655.2	652.8		654.36	6.65853	1.01756
Folate	650.4	648.6	653.4	654	669.6	666.6	654	655.8	655.2	655.2		656.28	6.65612	1.01422
citrate	755.4	766.8	712.8	656.4	784.2	757.2	811.2	760.2	688.2	782.4		747.48	47.5309	6.35882
(R)-Lactate	514.2	511.8	509.4	510	523.8	514.8	518.4	519	520.8	517.8		516	4.75815	0.922122

## Sheet: STD3
	B1STD3_1 RT/minutes	B1STD3_2 RT/minutes	B2STD3_1 RT/minutes	B2STD3_2 RT/minutes	B3STD3_1 RT/minutes	B3STD3_2 RT/minutes	B4STD3_1 RT/minutes	B4STD3_2 RT/minutes	B5STD3_1 RT/minutes	B5STD3_2 RT/minutes		Mean RT/minutes	standard deviation RT/minutes	RSD RT
lipoamide	292.2	297	293.4	294	299.4	295.8	294	293.4	296.4	296.4		295.2	2.17256	0.735961
2-Aminobutan-4-olide	380.4	380.4	379.2	379.8	391.2	384	381.6	381	382.8	382.2		382.26	3.45774	0.904553
Isonicotinic acid	412.2	411	408	409.8	424.2	412.8	418.8	419.4	421.2	418.2		415.56	5.46406	1.31487
O-Acetylcarnitine	516.6	519	522	524.4	540	535.8	521.4	523.2	520.8	520.8		524.4	7.494	1.42906
O-Acetyl-L-serine	585.6	583.8	584.4	586.2	601.2	595.8	589.8	591	591	589.8		589.86	5.42181	0.919169
5-Aminolevulinate	577.2	576.6	574.8	574.8	590.4	583.2	581.4	583.8	583.8	581.4		580.74	4.93518	0.849809
gamma-L-Glutamyl-L-cysteine	589.2	588	588	588.6	603.6	597	594	595.2	596.4	594.6		593.46	5.05529	0.851834
Acetylcholine	766.8	772.2	827.4	840	881.4	882	745.8	751.2	757.2	757.2		798.12	54.2865	6.8018
L-Cystine	644.4	644.4	645	645	663	655.8	649.8	649.8	649.2	648		649.44	5.93431	0.913758
Homocystine	652.2	650.4	652.8	654	673.8	669	654	657.6	657	655.8		657.66	7.64434	1.16236
Mercaptoethanol	390.6	390.6	393	393.6	406.2	397.8	391.8	392.4	395.4	393		394.44	4.66648	1.18306
Glutathione disulfide	653.4	657.6	654	654	673.8	669	657.6	660	660	655.8		659.52	6.78115	1.02819
D-Glucono-1_4-lactone	449.4	447.6	449.4	452.4	468.6	460.2	448.8	452.4	453.6	452.4		453.48	6.38624	1.40827
Acetoacetate	268.2	265.8	259.8	259.8	261	256.2	269.4	268.2	271.2	265.8		264.54	4.9996	1.88992
Maleic acid	563.4	561.6	552	550.8	561	553.2	567.6	570	568.8	570		561.84	7.53764	1.3416
D-Arabinose	604.2	601.2	609	612.6	627	623.4	606	606.6	607.8	607.8		610.56	8.30999	1.36104
D-Fructose	604.2	603.6	609	611.4	629.4	623.4	607.2	608.4	609.6	607.8		611.4	8.36182	1.36765
Orthophosphate	655.2	606	650.4	653.4	667.8	665.4	664.8	614.4	660.6	614.4		645.24	23.9636	3.71391
N-acetyl-L-glutamate	585	583.2	585	585.6	601.8	595.2	590.4	590.4	591.6	590.4		589.86	5.62459	0.953546
Itaconate	621.6	620.4	621.6	622.8	639.6	631.8	625.8	627	627	625.8		626.34	5.772	0.921544
D-Fructose 6-phosphate	634.8	634.2	635.4	637.2	653.4	649.2	640.2	640.8	640.8	638.4		640.44	6.28777	0.981788
2-phospho-D-glycerate	659.4	660.6	663	664.8	681.6	678.6	664.8	667.2	665.4	665.4		667.08	7.28176	1.09159
pyrophosphate	655.2	659.4	649.2	652.2	669	665.4	662.4	667.2	663	663		660.6	6.5238	0.987557
