# Supplementary figures and images for: Changes in Plasma Itaconate Elevation in Early Rheumatoid Arthritis Patients Elucidates Disease Activity Associated Macrophage Activation
Source: MDPI journal article supplement (doi:10.3390/metabo10060241), 2020-06-10

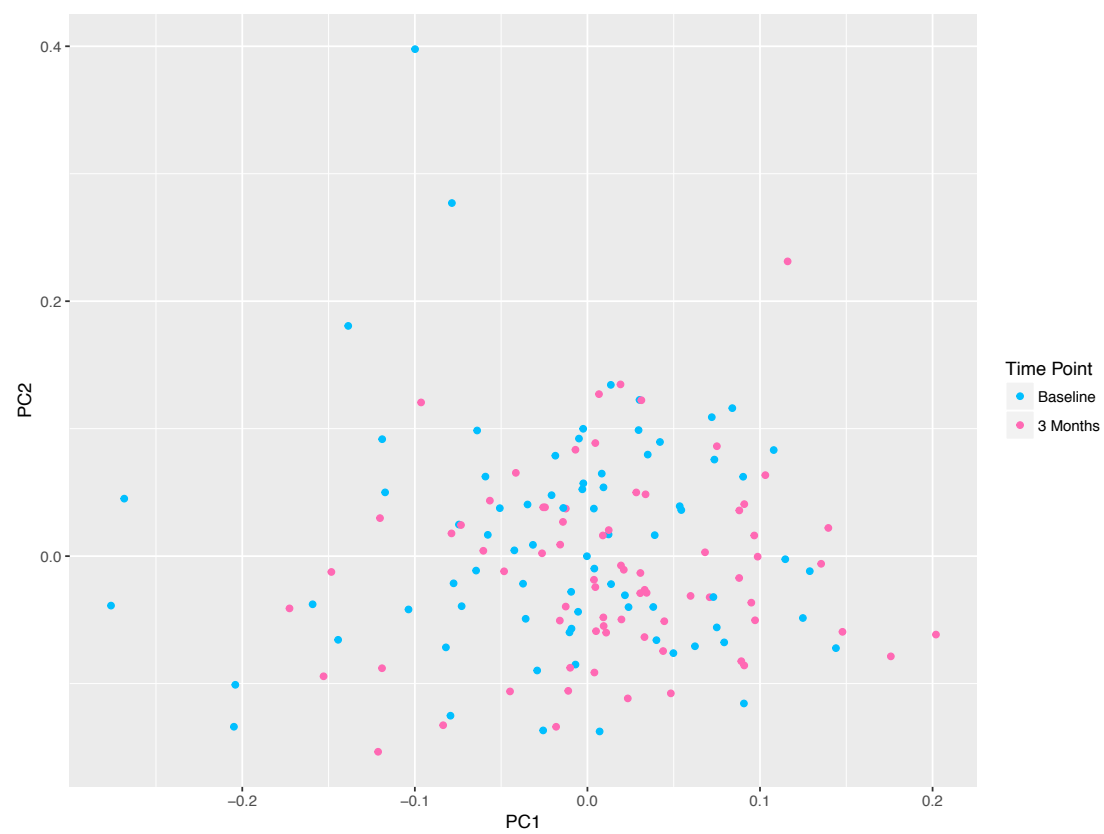

*Figure 1 Principal Component Analysis plot of the peak data at baseline and 3 months*

Supplement: s1 [file s1]
